# Supplementary material for: Evaluation of the Norwegian version of the Dyspnoea-12 questionnaire in patients with COPD
Source: HighWire-hosted journal article supplement (doi:10.1136/bmjresp-2022-001262), 2022-05-01
Supplement: bmjresp-2022-001262supp001_data_supplement.pdf [file bmjresp-2022-001262supp001_data_supplement.pdf]

**Supplementary file****Figure S1 Norwegian Dyspnoea-12**

Dette spørreskjemaet er laget for å hjelpe oss å forstå bedre hvordan pusteproblemene dine påvirker deg. Les hvert utsagn og kryss av ved det utsagnet som passer best på slik pusten din er *nå for tiden*. Hvis det er et utsagn som du ikke opplever/ ikke passer for deg krysser du av på "Ikke noe problem".

Vær så snill å svare på alle utsagnene.

| Påstander                                               | Ikke noe problem | I liten grad et problem | Moderat problem | Alvorlig problem |
|---------------------------------------------------------|------------------|-------------------------|-----------------|------------------|
| 1. Jeg får ikke pustet helt inn                         |                  |                         |                 |                  |
| 2. Jeg må anstrenge meg for å puste                     |                  |                         |                 |                  |
| 3. Jeg føler meg kortpustet                             |                  |                         |                 |                  |
| 4. Jeg har problemer med å puste inn                    |                  |                         |                 |                  |
| 5. Jeg får ikke nok luft                                |                  |                         |                 |                  |
| 6. Det er ubehagelig å puste                            |                  |                         |                 |                  |
| 7. Å puste er utmattende                                |                  |                         |                 |                  |
| 8. Pusteproblemene mine gjør at jeg føler meg deprimert |                  |                         |                 |                  |
| 9. Pusten min gjør at jeg føler meg nedfor              |                  |                         |                 |                  |
| 10. Pusten min gjør meg bekymret                        |                  |                         |                 |                  |
| 11. Pusten min gjør meg oppbrakt                        |                  |                         |                 |                  |
| 12. Pusten min er irriterende for meg                   |                  |                         |                 |                  |
